# Supplementary material
Source: PubMed Central journal article supplement (PMC3129153)
Supplement: supp_M110.213868_jbc.M110.213868-1.pdf [file supp_M110.213868_jbc.M110.213868-1.pdf]

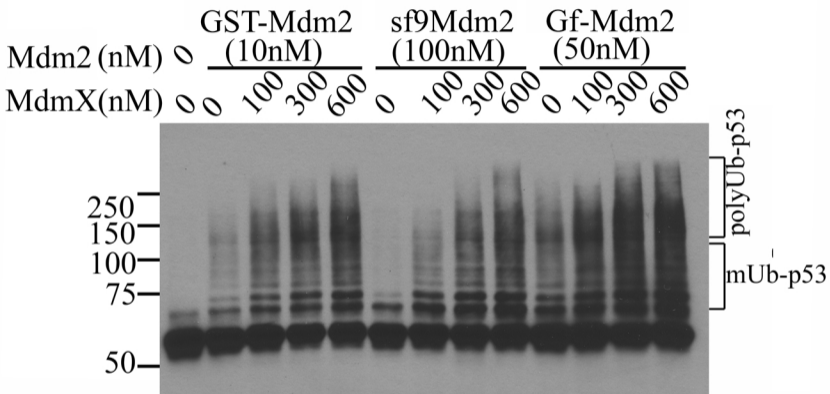

Supl Fig.1. MdmX effects on p53 ubiquitination in vitro by GST-Mdm2, Mdm2 (sf9Mdm2) and GST-free-Mdm2 (Gf-Mdm2). The concentrations of Mdm2 and MdmX are shown. The polyubiquitinated p53 (polyUb-p53) and multi-monoubiquitinated p53 (mUb-p53) are shown.
