# Supplementary material
Source: PubMed Central journal article supplement (PMC3129153)
Supplement: supp_M110.213868_jbc.M110.213868-2.pdf [file supp_M110.213868_jbc.M110.213868-2.pdf]

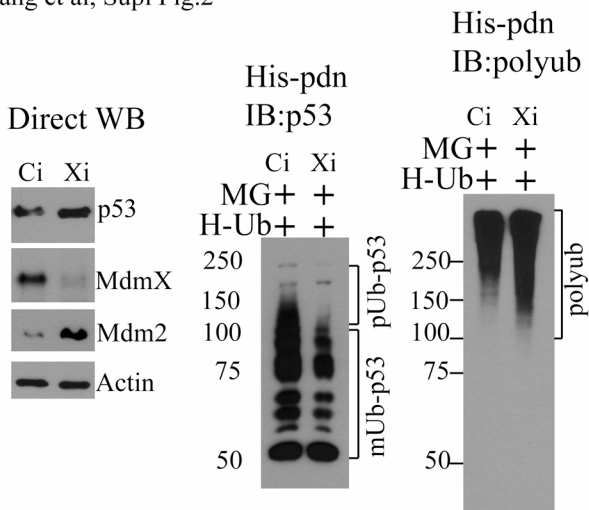

Supl Fig.2. Effects of siRNA knockdown of MdmX on p53 levels and polyubiquitination in MCF7 cells. Western blot analysis of p53 levels forty-eight hours after siRNA knockdown with either control oligos (Ci) or MdmX oligos (Xi) (Dharmacon On-Target SMART pool) (Left panel). In vivo p53 ubiquitination (middle panel) was done with cells treated with 50  $\mu$ M MG132 (MG) for five hours at thirty-six hours after siRNA and His-Ub (H-Ub) transfection followed by His-tag pulldown under denaturing conditions and Western blotting for p53 with a mixture of D0-1 and PAb1801 (middle panel). Then the membrane was stripped and re probed for polyubiquitin (right panel). pUb-p53, polyubiquitinated p53. mUb-p53, monoubiquitinated p53.
